# Supplementary material for: Lithium-rich sulfide Li2Ti1−xSixS3 cathode materials optimized through Si-doping for high-capacity all-solid-state lithium-ion batteries
Source: Royal Society of Chemistry journal article supplement (doi:10.1039/d3ta07222c), 2024-01-01
Supplement: d3ta07222c1.pdf [file d3ta07222c1.pdf]

## Supplementary information

Lithium-rich sulfide  $\text{Li}_2\text{Ti}_{1-x}\text{Si}_x\text{S}_3$  cathode materials optimized through Si-doping for high-capacity all-solid-state lithium-ion batteries

*Yaqi Hu*<sup>a</sup>, *Zongliang Zhang*<sup>b</sup>, *Siliang Liu*<sup>a</sup>, *Fangbo He*<sup>c</sup>, *Yang Liu*<sup>c</sup>, *Zhi Zhuang*<sup>c</sup>,  
*Fangyang Liu*<sup>a\*</sup>

<sup>a</sup> School of Metallurgy and Environment, Central South University, Changsha, Hunan, 410083, P. R. China

<sup>b</sup> Hunan Provincial Key Laboratory of Nonferrous Value-added Metallurgy, Changsha, Hunan, 410083, P. R. China

<sup>c</sup> Hunan Energy Frontiers New Materials Technology Co., LTD

**\*Corresponding author**

[liufangyang@csu.edu.cn](mailto:liufangyang@csu.edu.cn)

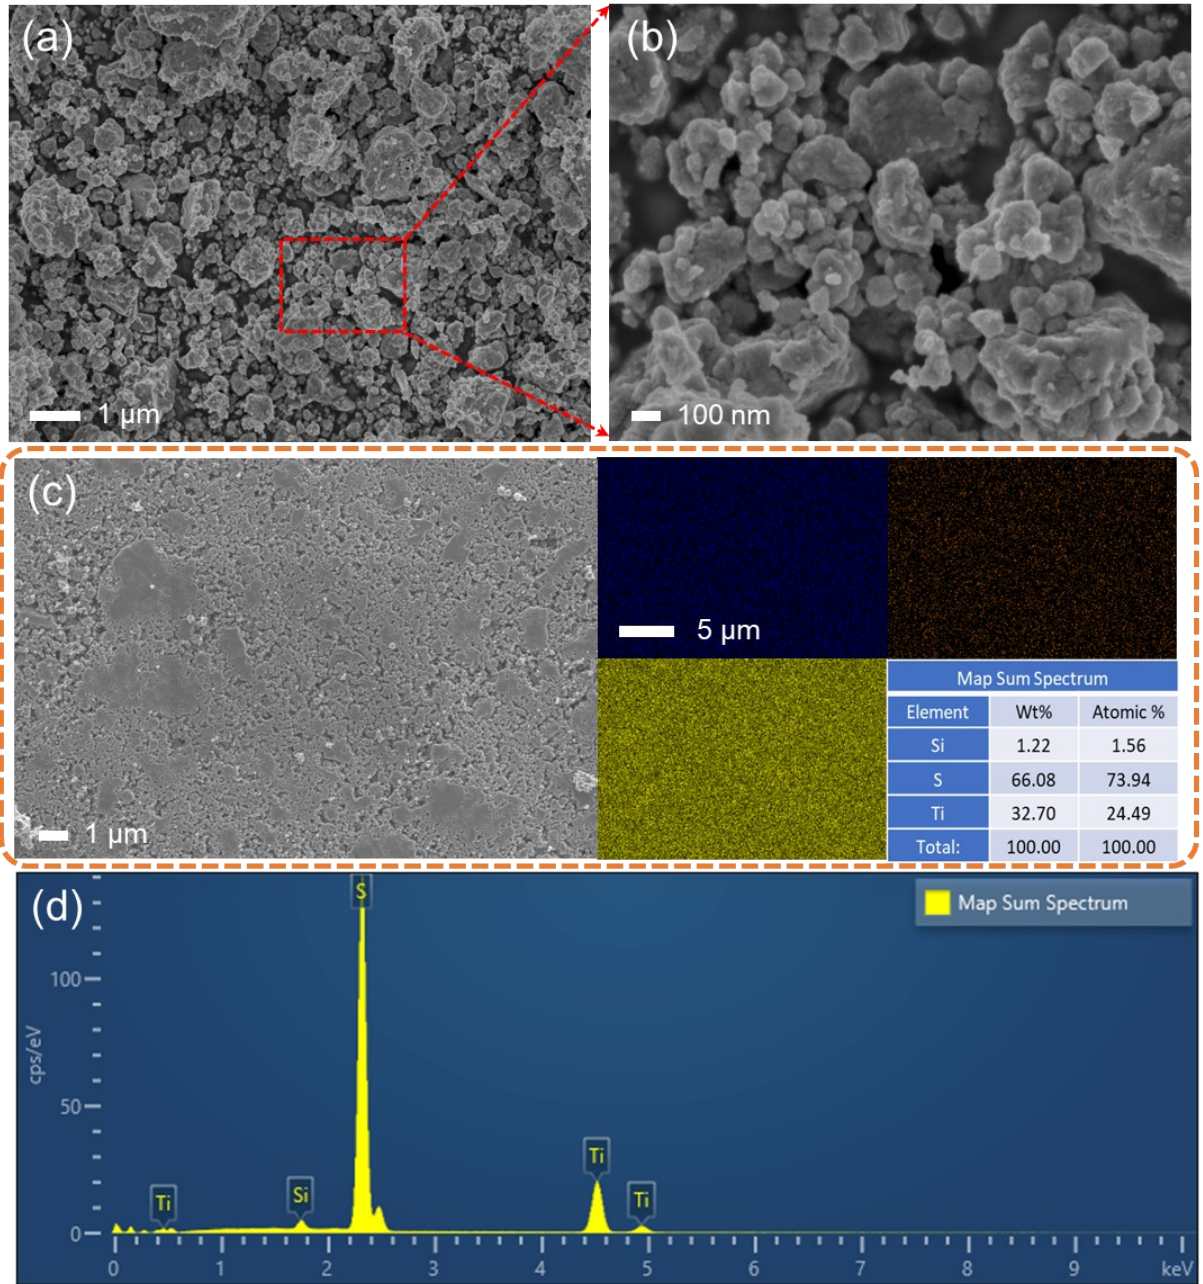

Figure S1 (a) (b) SEM images of R-Li<sub>2</sub>Ti<sub>1-x</sub>Si<sub>x</sub>S<sub>3</sub>. (c) SEM-EDS images and (d) Map Sum Spectrum of the surface on the compacted R-Li<sub>2</sub>Ti<sub>1-x</sub>Si<sub>x</sub>S<sub>3</sub> pellet.

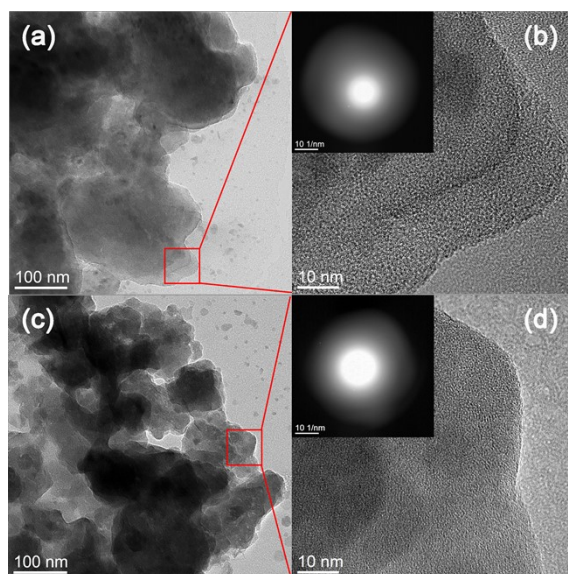

Figure S2 TEM and SAED images of (a) (b) R-Pristine and (c) (b) R-6%Si.

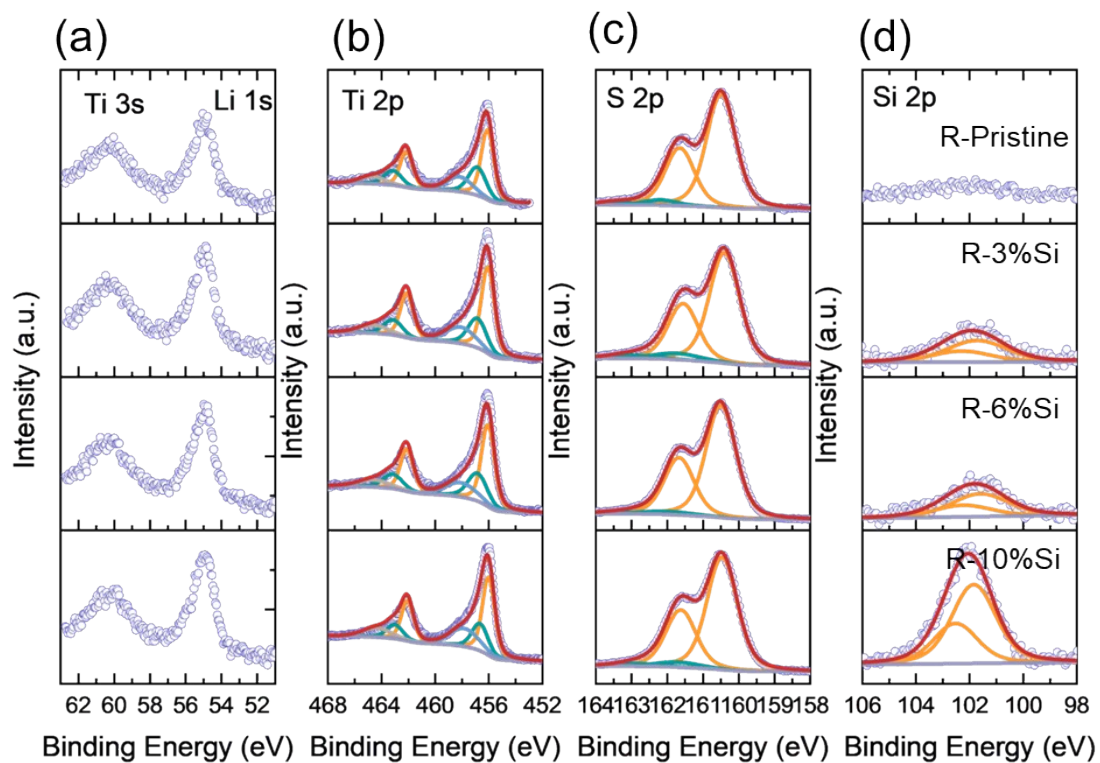

Figure S3 (a) Li 1s, (b) Ti 2p, (c) S 2p, and (d) Si 2p XPS spectra of the surface region on  $R\text{-Li}_2\text{Ti}_{1-x}\text{Si}_x\text{S}_3$ .

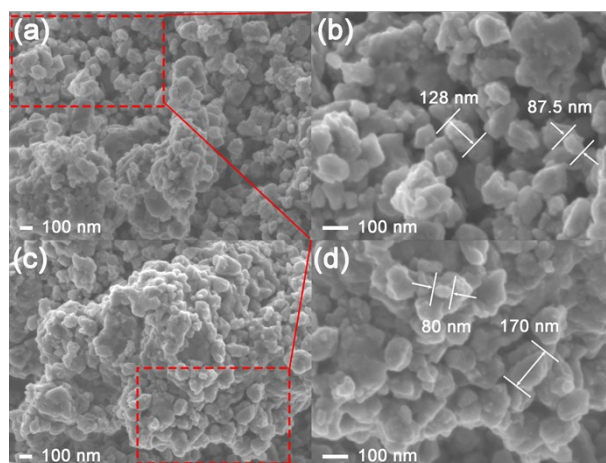

Figure S4 SEM images of (a) (b) L-Pristine and (c) (d) L-10%Si.

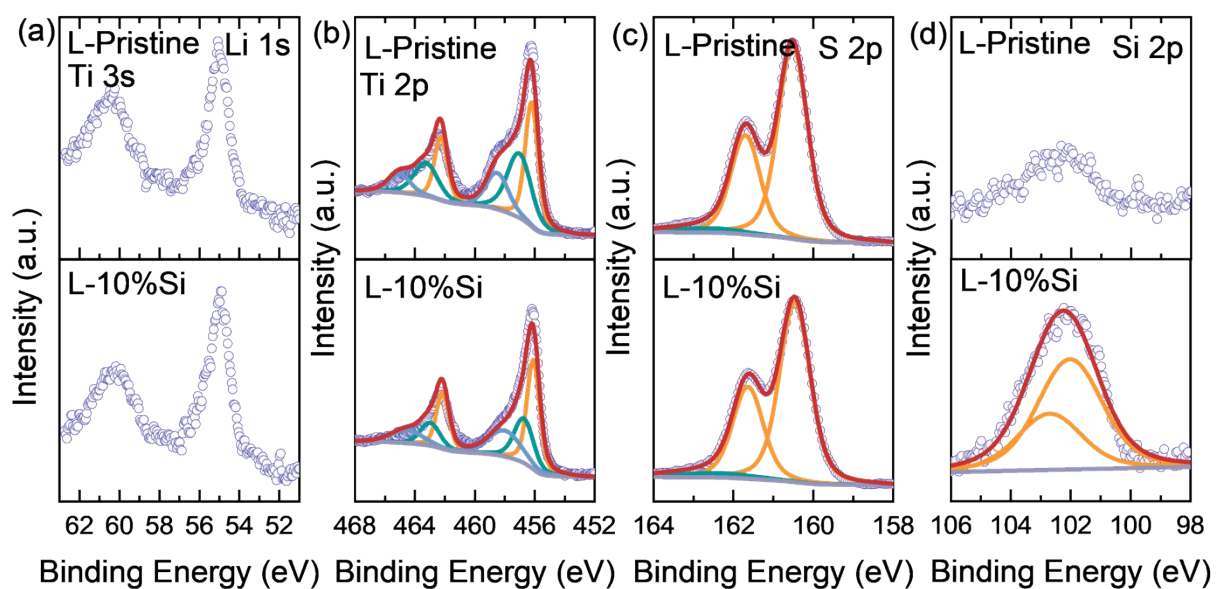

Figure S5 (a) Li 1s, (b) Ti 2p, (c) S 2p, and (d) Si 2p XPS spectra of L-Pristine and L-10%Si.



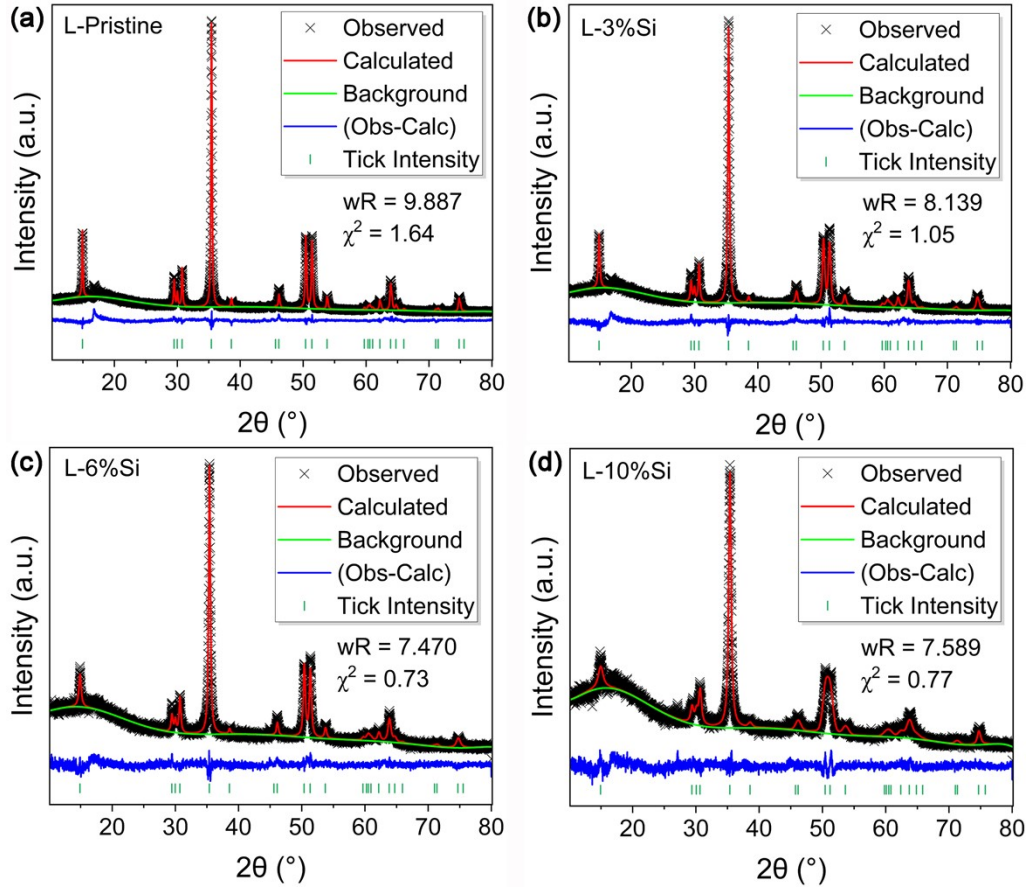

Figure S6 Refined XRD patterns of (f) L-Pristine, (g) L-3%Si, (h) L-6%Si and (i) L-10%Si.

Table S1 Refined structural parameters of L-Pristine.

| Atom                                                   | x | y | z       | Wyckoff | Frac   | Uiso    |
|--------------------------------------------------------|---|---|---------|---------|--------|---------|
| Li(0)                                                  | 0 | 0 | 0       | 3a      | 0.9009 | 0.17774 |
| Ti(1)                                                  | 0 | 0 | 0       | 3a      | 0.0991 | 0.17774 |
| Li(2)                                                  | 0 | 0 | 0.5     | 3b      | 0.4291 | 0.00205 |
| Ti(3)                                                  | 0 | 0 | 0.5     | 3b      | 0.5709 | 0.00205 |
| S(4)                                                   | 0 | 0 | 0.24726 | 6c      | 1.0000 | 0.02809 |
| a= b= 3.55956, c= 17.92400. wR= 9.887, $\chi^2$ = 1.64 |   |   |         |         |        |         |

Table S2 Refined structural parameters of L-3%Si.

| Atom                                                  | x | y | z       | Wyckoff | Occu.  | Uiso    |
|-------------------------------------------------------|---|---|---------|---------|--------|---------|
| Li(0)                                                 | 0 | 0 | 0       | 3a      | 0.8940 | 0.13509 |
| Ti(1)                                                 | 0 | 0 | 0       | 3a      | 0.0991 | 0.13509 |
| Li(2)                                                 | 0 | 0 | 0.5     | 3b      | 0.4360 | 0.00241 |
| Ti(3)                                                 | 0 | 0 | 0.5     | 3b      | 0.5441 | 0.00241 |
| S(4)                                                  | 0 | 0 | 0.24646 | 6c      | 1.0000 | 0.01795 |
| Si(5)                                                 | 0 | 0 | 0       | 3a      | 0.0069 | 0.13509 |
| Si(6)                                                 | 0 | 0 | 0.5     | 3b      | 0.0199 | 0.00241 |
| a= b= 3.56101, c= 17.91790. wR= 8.139, $\chi^2= 1.05$ |   |   |         |         |        |         |

Table S3 Refined structural parameters of L-6%Si.

| Atom                                                 | x | y | z       | Wyckoff | Occu.  | Uiso    |
|------------------------------------------------------|---|---|---------|---------|--------|---------|
| Li(0)                                                | 0 | 0 | 0       | 3a      | 0.8855 | 0.12771 |
| Ti(1)                                                | 0 | 0 | 0       | 3a      | 0.1027 | 0.12771 |
| Li(2)                                                | 0 | 0 | 0.5     | 3b      | 0.4445 | 0.00307 |
| Ti(3)                                                | 0 | 0 | 0.5     | 3b      | 0.5271 | 0.00307 |
| S(4)                                                 | 0 | 0 | 0.24641 | 6c      | 1.0000 | 0.01514 |
| Si(5)                                                | 0 | 0 | 0       | 3a      | 0.0118 | 0.12771 |
| Si(6)                                                | 0 | 0 | 0.5     | 3b      | 0.0284 | 0.00307 |
| a= b= 3.56320, c= 17.92628. wR= 7.47, $\chi^2= 0.73$ |   |   |         |         |        |         |

Table S4 Refined structural parameters of L-10%Si.

| Atom                                                  | x | y | z       | Wyckoff | Occu.  | Uiso    |
|-------------------------------------------------------|---|---|---------|---------|--------|---------|
| Li(0)                                                 | 0 | 0 | 0       | 3a      | 0.8603 | 0.22559 |
| Ti(1)                                                 | 0 | 0 | 0       | 3a      | 0.0890 | 0.22559 |
| Li(2)                                                 | 0 | 0 | 0.5     | 3b      | 0.4697 | 0.00352 |
| Ti(3)                                                 | 0 | 0 | 0.5     | 3b      | 0.5073 | 0.00352 |
| S(4)                                                  | 0 | 0 | 0.24618 | 6c      | 1.0000 | 0.03031 |
| Si(5)                                                 | 0 | 0 | 0       | 3a      | 0.0507 | 0.22559 |
| Si(6)                                                 | 0 | 0 | 0.5     | 3b      | 0.0230 | 0.00352 |
| a= b= 3.56999, c= 17.86797. wR= 7.589, $\chi^2= 0.77$ |   |   |         |         |        |         |

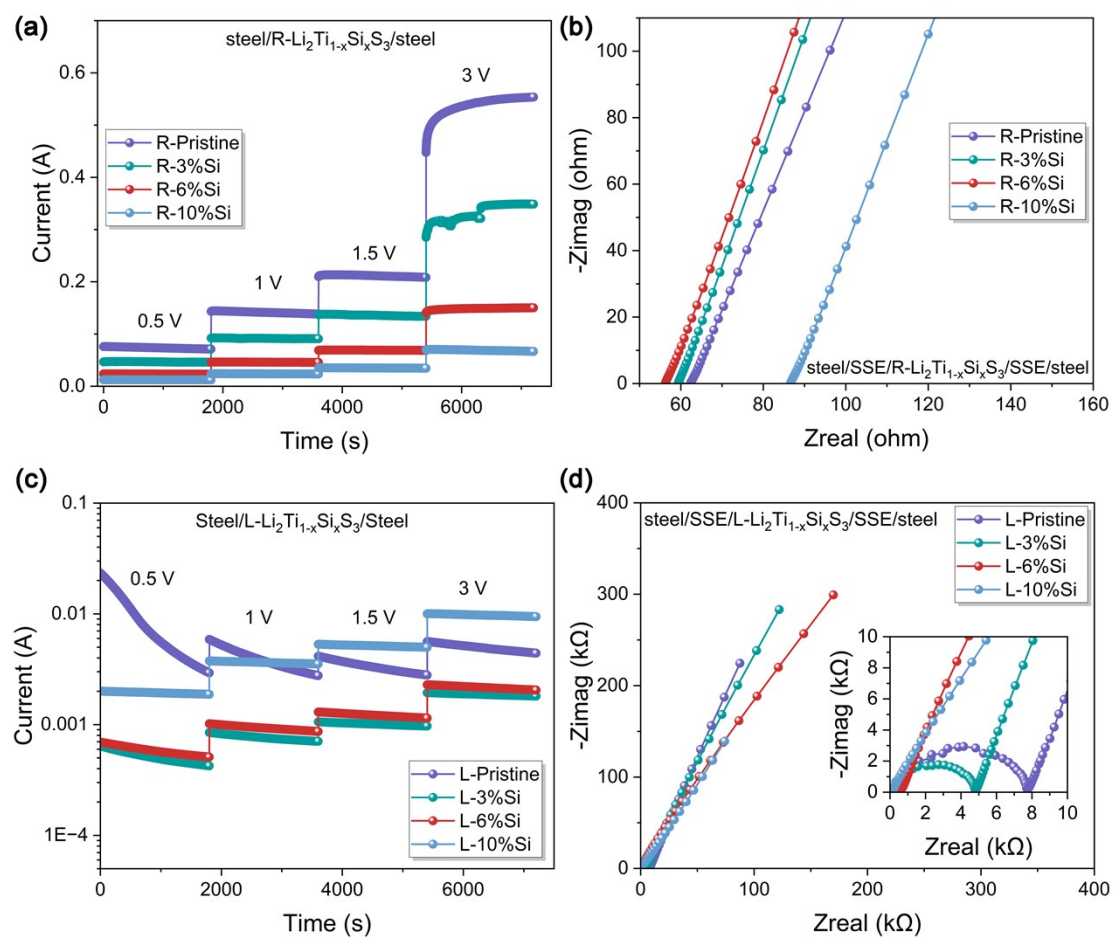

Figure S7 DC polarization plots of (a) R-Li<sub>2</sub>Ti<sub>1-x</sub>Si<sub>x</sub>S<sub>3</sub> and (c) L-Li<sub>2</sub>Ti<sub>1-x</sub>Si<sub>x</sub>S<sub>3</sub> under different bias voltages. AC impedance plots of (b) R-Li<sub>2</sub>Ti<sub>1-x</sub>Si<sub>x</sub>S<sub>3</sub> and (d) L-Li<sub>2</sub>Ti<sub>1-x</sub>Si<sub>x</sub>S<sub>3</sub>.



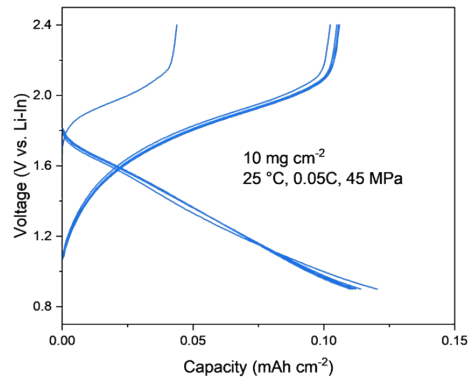

Figure S8 Charge/discharge curves of R-Li<sub>2</sub>Ti<sub>1-x</sub>Si<sub>x</sub>S<sub>3</sub> at 0.05C and 25 °C without any conductive additives.

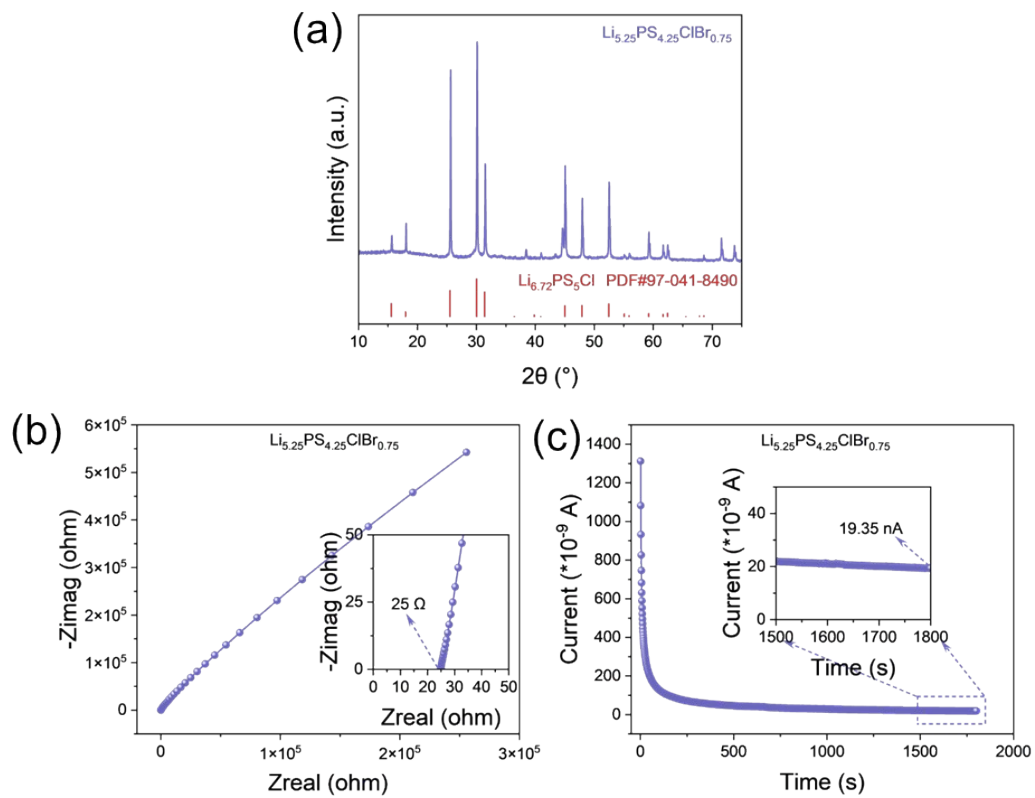

Figure S9 (a) XRD pattern, (b) AC impedance plot, and (c) DC polarization plot of Li<sub>5.25</sub>PS<sub>4.25</sub>ClBr<sub>0.75</sub>.

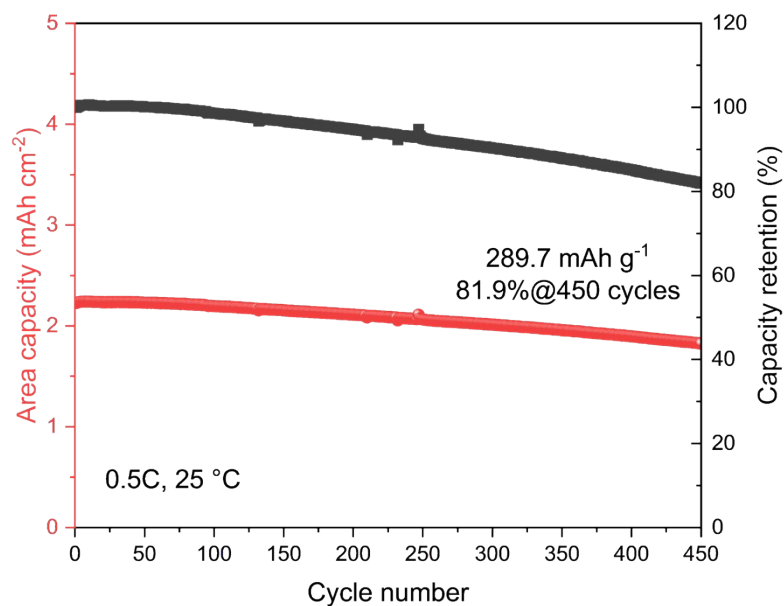

Figure S10 Cycling performance of R-6%Si at 0.5C and 25 °C.

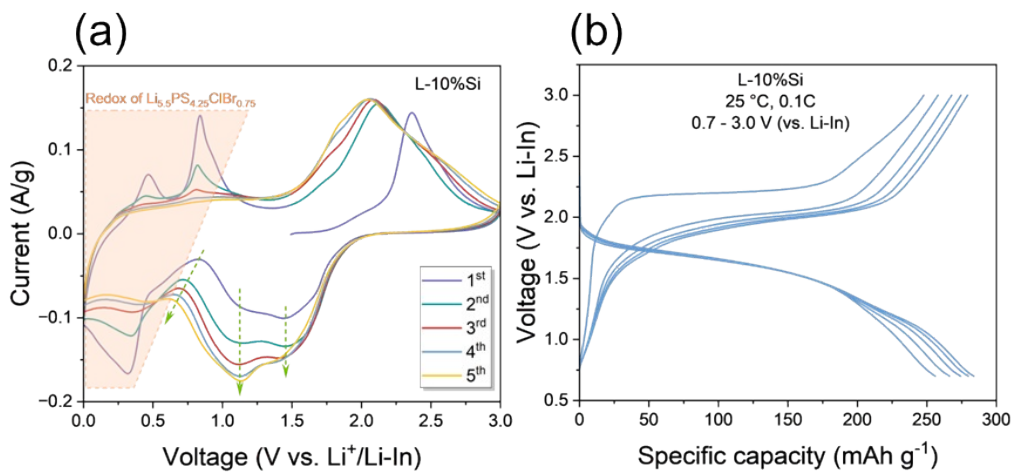

Figure S11 The CV curves of L-10%Si at 0 - 3.0 V (vs. Li-In). (b) The charge-discharge profiles at the first five cycles with the discharge potential extending to 0.7 V (vs. Li-In).

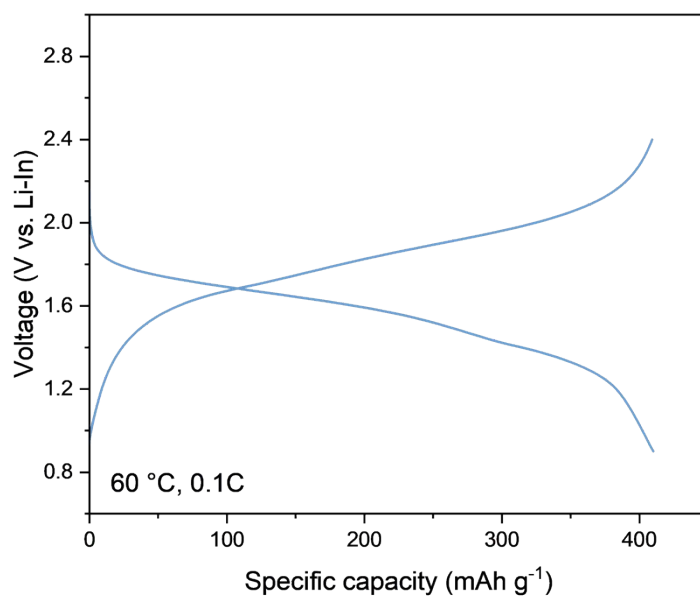

Figure S12 The charge-discharge curve of the cell based on the high-loading cathode film. at 60°C, achieving a discharge capacity of 410.19 mAh g<sup>-1</sup>.

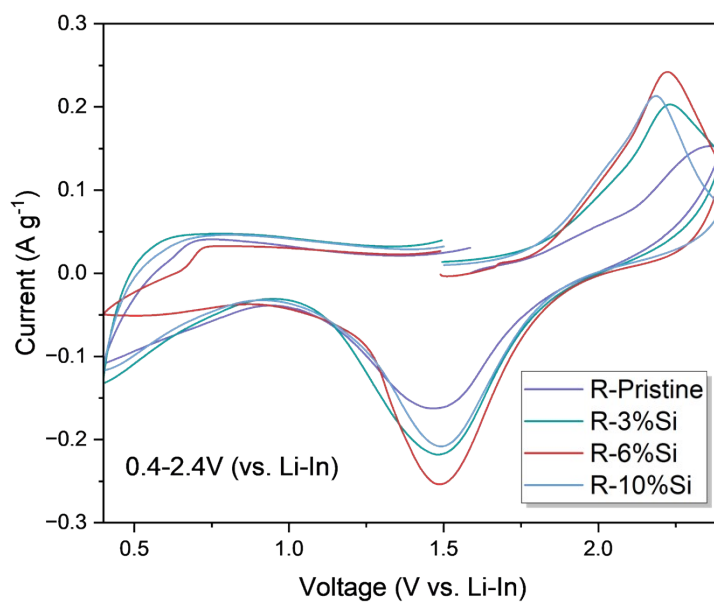

Figure S13 The CV curves of the R-Li<sub>2</sub>Ti<sub>1-x</sub>Si<sub>x</sub>S<sub>3</sub> cathodes.

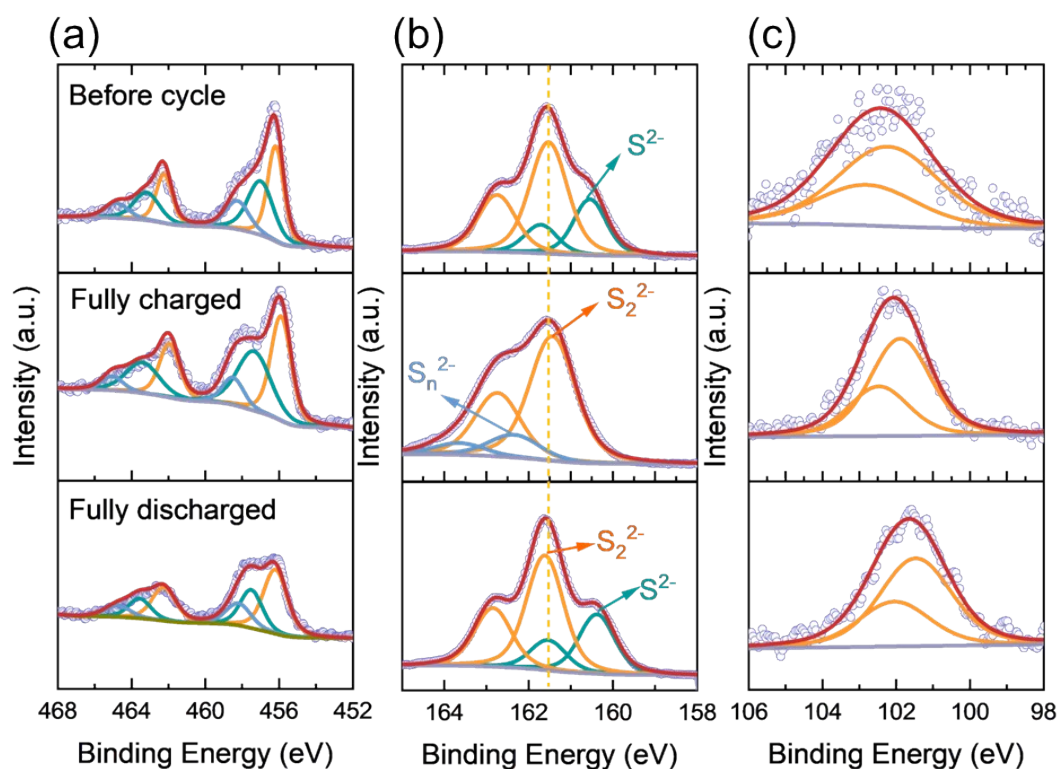

Figure S14 (a) Ti 2p, (b) S 2p, and (c) Si 2p XPS spectra of the R-6%Si cathode in different charge of state at the first cycle.

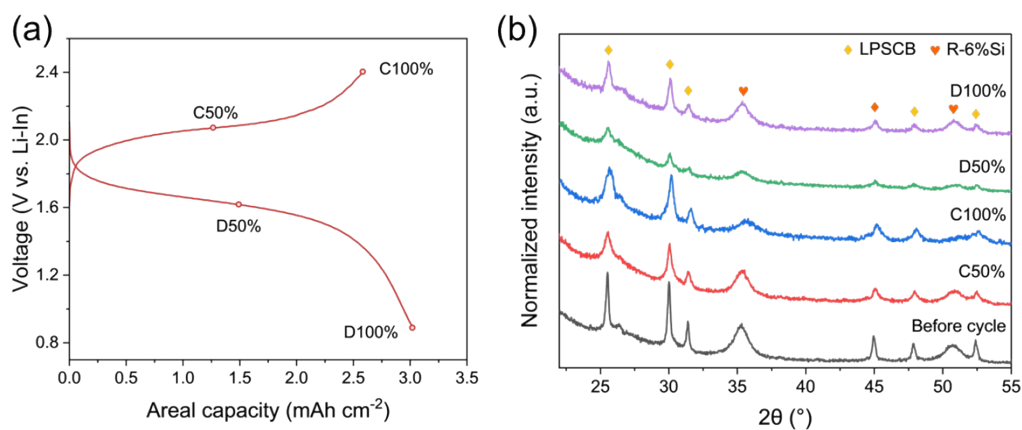

Figure S15 (a) Charge-discharge curve of R-6%Si. (b) Normalized XRD patterns of the R-6%Si cathode in different charge of state at the first cycle.

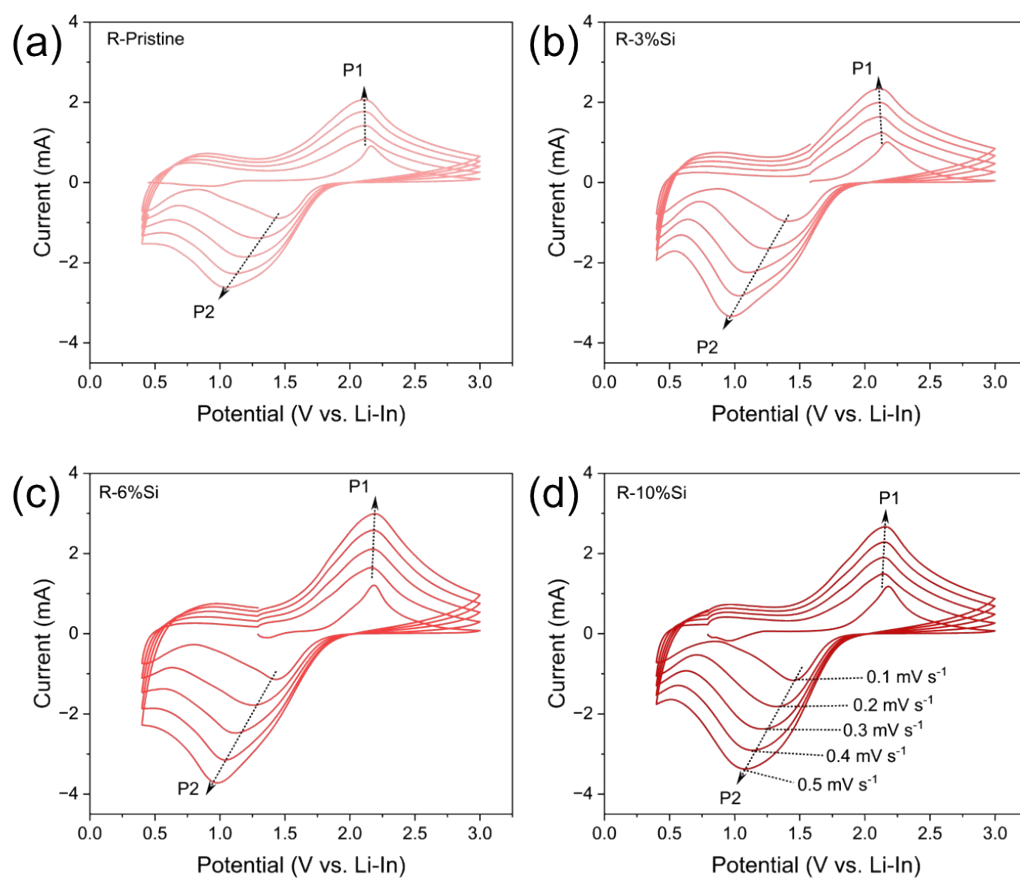

Figure S16 CV curves of (a) R-Pristine, (b) R-3%Si, (c) R-6%Si and (d) R-10%Si at scanning rates of 0.1, 0.2, 0.3, 0.4 and 0.5  $\text{mV s}^{-1}$ .

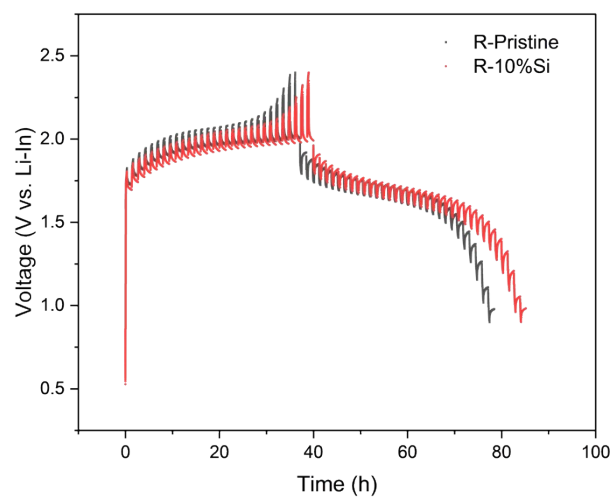

Figure S17 Charge/discharge GITT profiles of R-Pristine and R-10%Si.

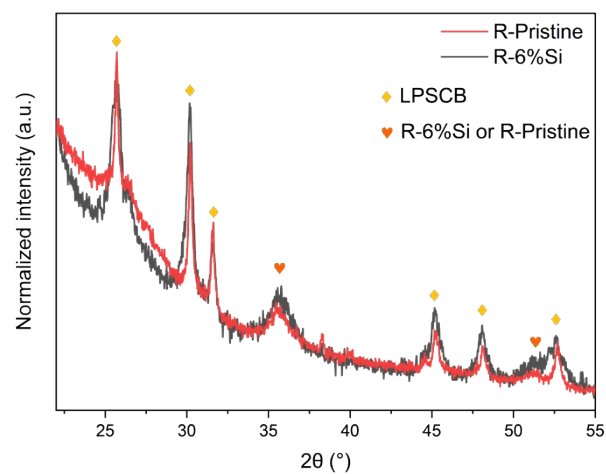

Figure S18 XRD patterns of R-Pristine and R-6%Si composite cathode fully charged (C100%).



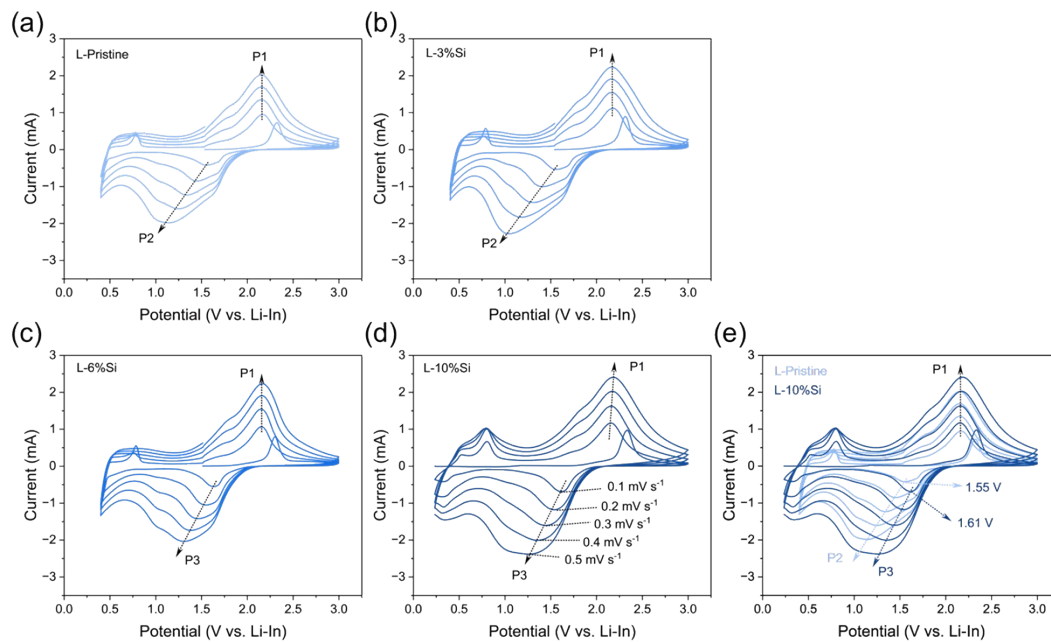

Figure S19 CV curves of (a) L-Pristine, (b) L-3%Si, (c) L-6%Si and (d) L-10%Si at scanning rates of 0.1, 0.2, 0.3, 0.4 and 0.5  $\text{mV s}^{-1}$ . (e) Comparison of CV curves for L-Pristine and L-10%Si.

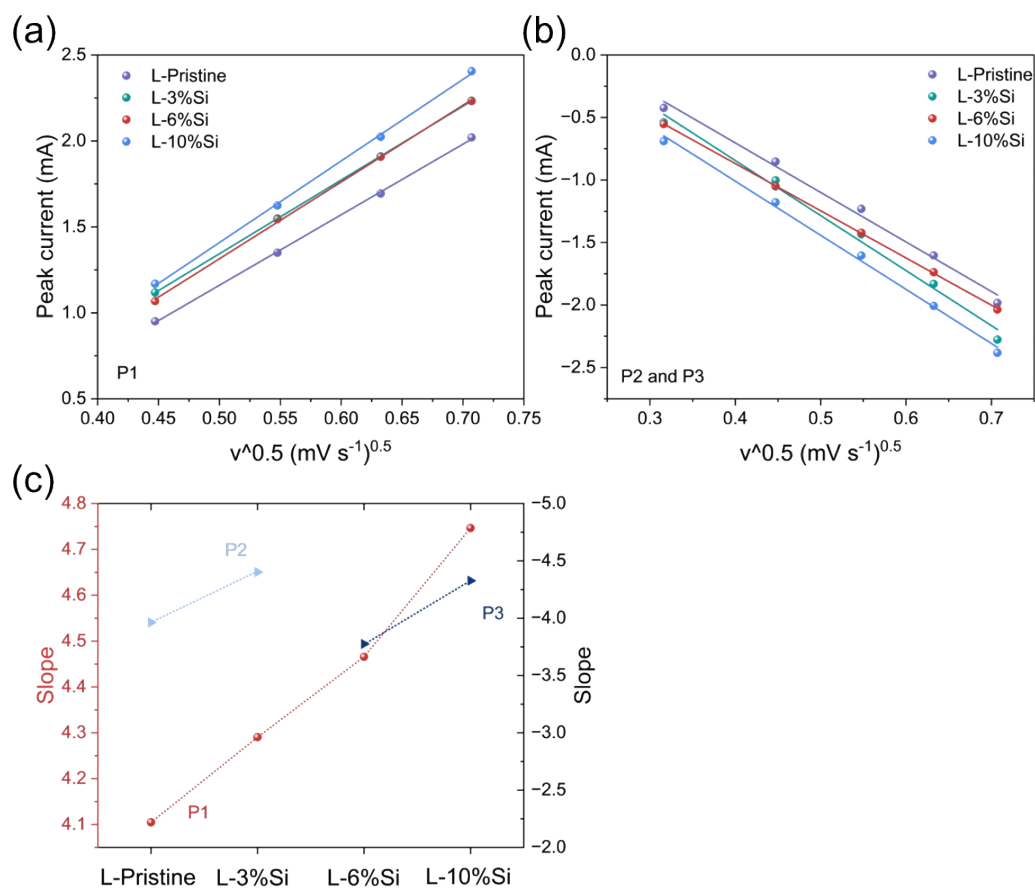

Figure S20 The relationship of (a) oxidation (P1) and (b) reduction (P2 or P3) peak current of different L-Li<sub>2</sub>Ti<sub>1-x</sub>Si<sub>x</sub>S<sub>3</sub> cathodes versus square root of the scanning rates ( $v^{0.5}$ ). (c) Comparison of slopes of fitted lines in Figure S20 (a) and (b).
